# Supplementary material for: Combining Heat Stress with Pre-Existing Drought Exacerbated the Effects on Chlorophyll Fluorescence Rise Kinetics in Four Contrasting Plant Species
Source: MDPI journal article supplement (doi:10.3390/ijms221910682), 2021-10-01
Supplement: s1 [file s1]

## **Supporting information for**

**Combining heat stress with pre-existing drought exacerbated effects on chlorophyll fluorescence rise kinetics in four contrasting plant species**

**Authors: Lingling Zhu, Wei Wen, Michael R. Thorpe, Charles H. Hocart, Xin Song**

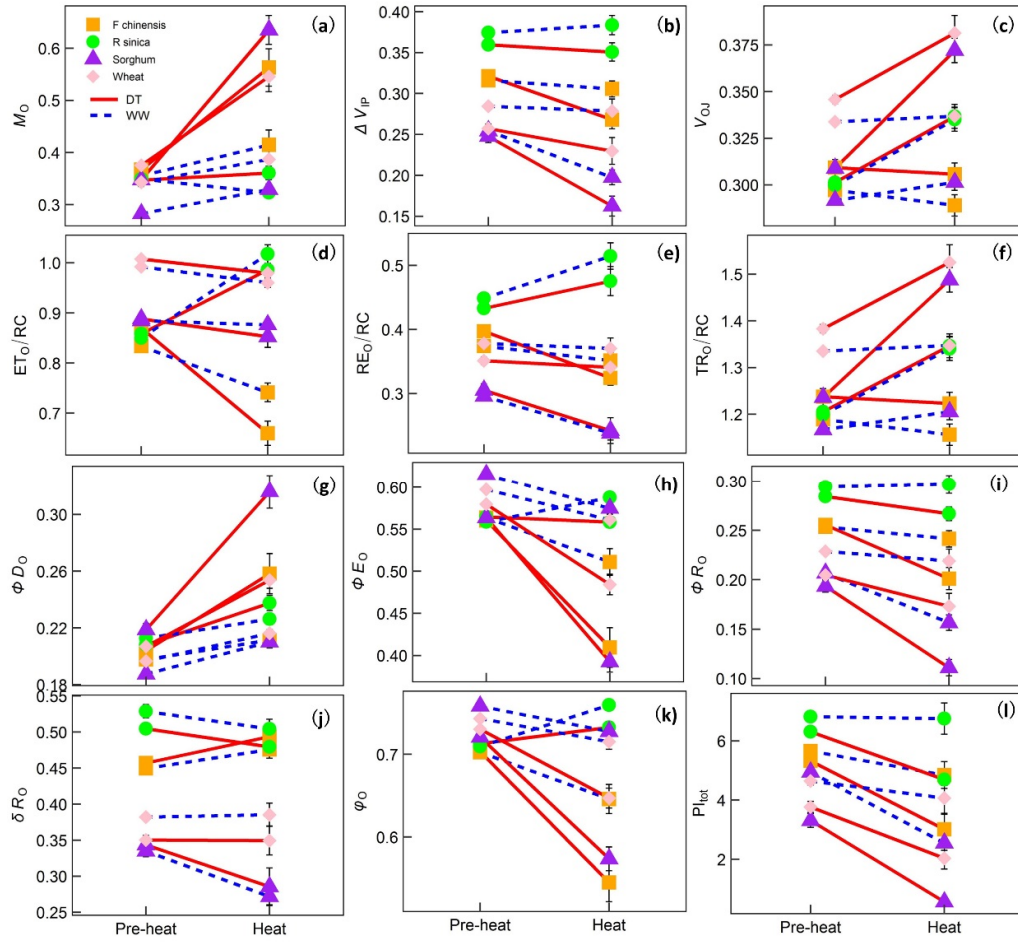

**Figure S1.** Responses of chlorophyll fluorescence OJIP parameters to either heat, drought or their combination in four plant species. Red line connects each drought-treated (DT) species under pre-heat and heat treatments; blue dashed line connects each well-watered (WW) species. The corresponding linear mixed-effects model analysis of variances results are shown in Table S3.

**Table S1.** Linear mixed-effects model analysis of variance of the effects of heat and drought and their interaction on OJIP parameters.

|                       |         | Heat               | Drought            | Species            | Heat x<br>Drought  | Heat x<br>Species  | Drought x<br>Species | Heat x<br>Drought x<br>Species |
|-----------------------|---------|--------------------|--------------------|--------------------|--------------------|--------------------|----------------------|--------------------------------|
| <i>Mo</i>             | t value | 10.482             | -1.364             | -1.783             | -5.041             | -5.95              | -3.686               | -1.838                         |
|                       | P value | <b>&lt; 0.0001</b> | 0.173              | 0.075              | <b>&lt; 0.0001</b> | <b>&lt; 0.0001</b> | <b>0.0002</b>        | 0.066                          |
| <i>V<sub>OJ</sub></i> | t value | -1.005             | -4.422             | 11.867             | -0.780             | 6.896              | 2.377                | -3.385                         |
|                       | P value | 0.315              | <b>&lt; 0.0001</b> | <b>&lt; 0.0001</b> | 0.435              | <b>&lt; 0.0001</b> | <b>0.018</b>         | <b>0.0007</b>                  |
| $\Delta V_{IP}$       | t value | -4.951             | -0.655             | -9.138             | 2.814              | 2.650              | 3.794                | -1.168                         |
|                       | P value | <b>&lt; 0.0001</b> | 0.513              | <b>&lt; 0.0001</b> | <b>0.005</b>       | <b>0.008</b>       | <b>0.0001</b>        | 0.243                          |
| TRo/RC                | t value | -1.02              | -4.444             | 11.838             | -0.767             | 6.896              | 2.390                | -3.388                         |
|                       | P value | 0.308              | <b>&lt; 0.0001</b> | <b>&lt; 0.0001</b> | 0.443              | <b>&lt; 0.0001</b> | <b>0.017</b>         | <b>0.0007</b>                  |
| ETo/RC                | t value | -17.693            | -3.916             | 14.612             | 7.185              | 16.312             | 1.820                | -3.354                         |
|                       | P value | <b>&lt; 0.0001</b> | 0.069                | <b>0.0008</b>                  |
| REo/RC                | t value | -6.031             | -2.572             | -7.732             | 2.861              | 5.238              | 4.550                | 1.739                          |
|                       | P value | <b>&lt; 0.0001</b> | <b>0.01</b>        | <b>&lt; 0.0001</b> | <b>0.004</b>       | <b>&lt; 0.0001</b> | <b>&lt; 0.0001</b>   | 0.082                          |
| $\Phi E_o$            | t value | -17.579            | 0.639              | 2.883              | 8.517              | 10.650             | 3.448                | -3.926                         |
|                       | P value | <b>&lt; 0.0001</b> | 0.523              | <b>0.004</b>       | <b>&lt; 0.0001</b> | <b>&lt; 0.0001</b> | <b>0.0006</b>        | <b>&lt; 0.0001</b>             |
| $\Phi D_o$            | t value | 11.109             | -2.503             | 3.974              | -5.440             | 4.152              | -5.300               | -2.046                         |
|                       | P value | <b>&lt; 0.0001</b> | <b>0.012</b>       | <b>&lt; 0.0001</b> | <b>&lt; 0.0001</b> | <b>&lt; 0.0001</b> | <b>&lt; 0.0001</b>   | <b>0.041</b>                   |
| $\Phi R_o$            | t value | -6.512             | -0.308             | -8.742             | 3.643              | -3.46              | 3.682                | -1.492                         |
|                       | P value | <b>&lt; 0.0001</b> | 0.758              | <b>&lt; 0.0001</b> | <b>0.0003</b>      | <b>0.00005</b>     | <b>0.0002</b>        | 0.136                          |
| $\delta R_o$          | t value | 2.325              | -0.761             | -12.44             | -0.519             | -4.032             | 3.797                | 0.699                          |
|                       | P value | <b>0.02</b>        | 0.446              | <b>&lt; 0.0001</b> | 0.603              | <b>&lt; 0.0001</b> | <b>0.0002</b>        | 0.484                          |

|                   |         |                    |       |                    |                    |                    |                    |               |
|-------------------|---------|--------------------|-------|--------------------|--------------------|--------------------|--------------------|---------------|
| $\varphi_0$       | t value | -17.385            | 0.014 | 4.004              | 8.131              | 11.961             | 2.647              | -3.911        |
|                   | P value | <b>&lt; 0.0001</b> | 0.988 | <b>&lt; 0.0001</b> | <b>&lt; 0.0001</b> | <b>&lt; 0.0001</b> | <b>0.008</b>       | <b>0.0001</b> |
| PI <sub>tot</sub> | t value | -12.384            | 1.491 | -2.048             | 6.021              | 6.04               | 4.016              | -2.213        |
|                   | P value | <b>&lt; 0.0001</b> | 0.136 | <b>0.041</b>       | <b>&lt; 0.0001</b> | <b>&lt; 0.0001</b> | <b>&lt; 0.0001</b> | <b>0.027</b>  |

---

**Table S2.** Linear mixed-effects model analysis of variance of the effects of heat release and re-watering on OJIP parameters.

|                 |         | Heat<br>release<br>(DT) | Species            | Heat<br>release<br>(DT) x<br>Species | Heat<br>release<br>(WW) | Species            | Heat<br>release<br>(WW) x<br>Species | Re-<br>watering<br>(DT) | Species            | Re-<br>watering<br>(DT) x<br>Species |
|-----------------|---------|-------------------------|--------------------|--------------------------------------|-------------------------|--------------------|--------------------------------------|-------------------------|--------------------|--------------------------------------|
| $M_o$           | t value | -5.616                  | -5.771             | 3.417                                | -0.625                  | -3.744             | 1.732                                | 1.104                   | 4.431              | 3.213                                |
|                 | P value | <b>&lt; 0.0001</b>      | <b>&lt; 0.0001</b> | <b>0.0007</b>                        | 0.532                   | <b>0.0002</b>      | 0.085                                | 0.27                    | <b>&lt; 0.0001</b> | <b>0.005</b>                         |
| $V_{OJ}$        | t value | 0.542                   | 4.982              | -2.596                               | 2.956                   | 8.209              | -5.895                               | 0.436                   | 7.129              | 4.704                                |
|                 | P value | 0.588                   | <b>&lt; 0.0001</b> | <b>0.01</b>                          | <b>0.004</b>            | <b>&lt; 0.0001</b> | <b>&lt; 0.0001</b>                   | 0.663                   | <b>&lt; 0.0001</b> | <b>&lt; 0.0001</b>                   |
| $\Delta V_{IP}$ | t value | 2.993                   | -5.473             | -2.233                               | 1.162                   | -4.973             | -1.490                               | -0.805                  | -9.419             | 2.967                                |
|                 | P value | <b>0.003</b>            | <b>&lt; 0.0001</b> | <b>0.027</b>                         | 0.247                   | <b>&lt; 0.0001</b> | 0.138                                | 0.421                   | <b>&lt; 0.0001</b> | <b>0.003</b>                         |
| TRo/RC          | t value | 0.553                   | 3.441              | 4.978                                | 2.951                   | 8.207              | -5.892                               | 0.441                   | 7.122              | 4.701                                |
|                 | P value | 0.58                    | <b>0.0007</b>      | <b>&lt; 0.0001</b>                   | <b>0.004</b>            | <b>&lt; 0.0001</b> | <b>&lt; 0.0001</b>                   | 0.66                    | <b>&lt; 0.0001</b> | <b>&lt; 0.0001</b>                   |
| ETo/RC          | t value | 9.911                   | 12.897             | -8.879                               | 4.991                   | 13.597             | -9.091                               | -0.807                  | 6.374              | 3.915                                |
|                 | P value | <b>&lt; 0.0001</b>      | <b>&lt; 0.0001</b> | <b>&lt; 0.0001</b>                   | <b>&lt; 0.0001</b>      | <b>&lt; 0.0001</b> | <b>&lt; 0.0001</b>                   | 0.42                    | <b>&lt; 0.0001</b> | <b>&lt; 0.0001</b>                   |
| REo/RC          | t value | 3.571                   | 5.839              | -3.395                               | 2.647                   | 8.363              | -4.323                               | -0.615                  | -6.48              | 3.482                                |
|                 | P value | <b>&lt; 0.0001</b>      | <b>&lt; 0.0001</b> | <b>0.0008</b>                        | <b>0.009</b>            | <b>&lt; 0.0001</b> | <b>&lt; 0.0001</b>                   | 0.538                   | <b>&lt; 0.0001</b> | <b>0.0006</b>                        |
| $\Phi E_o$      | t value | 8.332                   | 7.54               | 4.716                                | 1.778                   | 4.912              | -3.387                               | -1.272                  | -2.118             | -1.858                               |
|                 | P value | <b>&lt; 0.0001</b>      | <b>&lt; 0.0001</b> | <b>&lt; 0.0001</b>                   | 0.77                    | <b>&lt; 0.0001</b> | <b>0.0008</b>                        | 0.204                   | <b>0.035</b>       | 0.064                                |
| $\Phi D_o$      | t value | -4.931                  | 3.047              | 2.532                                | 0.409                   | 2.733              | -2.852                               | 1.017                   | 2.735              | 2.592                                |
|                 | P value | <b>&lt; 0.0001</b>      | <b>0.003</b>       | <b>0.012</b>                         | 0.683                   | <b>0.001</b>       | <b>0.004</b>                         | 0.31                    | <b>0.007</b>       | <b>0.01</b>                          |
| $\Phi R_o$      | t value | 3.789                   | -5.498             | -2.49                                | 1.109                   | -4.682             | -1.674                               | -0.913                  | -9.288             | -2.412                               |
|                 | P value | <b>0.0002</b>           | <b>&lt; 0.0001</b> | <b>0.014</b>                         | 0.269                   | <b>&lt; 0.0001</b> | 0.095                                | 0.362                   | <b>&lt; 0.0001</b> | <b>0.017</b>                         |
| $\delta R_o$    | t value | -1.466                  | -7.639             | 2.549                                | 0.063                   | 1.402              | -8.646                               | -0.294                  | -10.095            | 3.447                                |

|            |         |                 |                 |                 |             |                 |                 |        |                 |               |
|------------|---------|-----------------|-----------------|-----------------|-------------|-----------------|-----------------|--------|-----------------|---------------|
|            | P value | 0.144           | < <b>0.0001</b> | <b>0.012</b>    | 0.95        | 0.163           | < <b>0.0001</b> | 0.769  | < <b>0.0001</b> | <b>0.0006</b> |
| $\phi_0$   | t value | 9.060           | 9.485           | 6.335           | 2.188       | 6.498           | -3.575          | -1.357 | -1.85           | 1.537         |
|            | P value | < <b>0.0001</b> | < <b>0.0001</b> | < <b>0.0001</b> | <b>0.03</b> | < <b>0.0001</b> | <b>0.0004</b>   | 0.176  | 0.066           | 0.126         |
| $PI_{tot}$ | t value | 6.175           | 4.804           | -3.78           | 0.722       | 2.445           | -2.16           | -1.155 | -4.898          | -3.112        |
|            | P value | < <b>0.0001</b> | < <b>0.0001</b> | <b>0.0002</b>   | 0.471       | <b>0.015</b>    | <b>0.032</b>    | 0.249  | < <b>0.0001</b> | <b>0.002</b>  |

---

**Table S3.** Linear regression results between  $\Phi E_o$  and  $J$ ,  $RE_o/RC$  and  $V_{cmax}$ ,  $\delta R_o$  and  $A_{net}$ .

| Linear model                   | a        | b         | $r^2$  | $P$      |
|--------------------------------|----------|-----------|--------|----------|
| $\Phi E_o = a + b * J$         |          |           | 0.4110 | < 0.0001 |
| Wheat                          | 0.4533   | 0.0009    |        |          |
| Sorghum                        | 0.2913   | 0.0015    |        |          |
| <i>F. chinensis</i>            | 0.3103   | 0.0021    |        |          |
| <i>R. sinica</i>               | 0.4983   | 0.0005    |        |          |
| $RE_o/RC = a + b * V_{cmax}$   |          | 0.001     | 0.7155 | < 0.0001 |
| Wheat                          | 0.2674   |           |        |          |
| Sorghum                        | 0.2525   |           |        |          |
| <i>F. chinensis</i>            | 0.3030   |           |        |          |
| <i>R. sinica</i>               | 0.3636   |           |        |          |
| $\delta R_o = a + b * A_{net}$ |          |           | 0.8232 | < 0.0001 |
| Wheat                          | 2.61E-01 | -2.17E-01 |        |          |
| Sorghum                        | 3.56E-01 | -1.89E-03 |        |          |
| <i>F. chinensis</i>            | 4.76E-01 | -1.82E-03 |        |          |
| <i>R. sinica</i>               | 4.96E-01 | 5.52E-04  |        |          |
